# Supplementary material
Source: HighWire-hosted journal article supplement (http://ebm.bmjjournals.com/highwire/filestream/142120/field_highwire_adjunct_files/1/ebmed-2013-101637supp2.pdf)
Supplement: ebmed-2013-101637supp2.pdf [file ebmed-2013-101637supp2.pdf]

**Web only file 2:** Table of pooled results of adherence per individual STARD item comparing studies published pre- and post-STARD.

| STARD item                                         | Pre-STARD    |                            |                           | Post-STARD                 |                           | Overall                       |
|----------------------------------------------------|--------------|----------------------------|---------------------------|----------------------------|---------------------------|-------------------------------|
|                                                    | Studies<br>n | Evaluated<br>articles<br>n | Item<br>reported<br>n (%) | Evaluated<br>articles<br>n | Item<br>reported<br>n (%) | Effect estimate<br>OR (95%CI) |
| 1. Study identified as test accuracy study         | 4            | 396                        | 108 (27.3%)               | 220                        | 64 (29.1%)                | 1.80 [0.63, 5.08]             |
| 2. Research questions/aims                         | 4            | 396                        | 339 (85.6%)               | 220                        | 204 (92.7%)               | 1.52 [0.70, 3.31]             |
| 3. Study population                                | 5            | 516                        | 290 (56.2%)               | 340                        | 147 (43.2%)               | 0.94 [0.63, 1.40]             |
| 4. Participant recruitment                         | 5            | 516                        | 395 (76.6%)               | 340                        | 316 (92.9%)               | 2.89 [1.41, 5.92]             |
| 5. Participant sampling                            | 5            | 516                        | 234 (45.3%)               | 340                        | 223 (65.6%)               | 1.89 [1.33, 2.69]             |
| 6. Data collection                                 | 5            | 516                        | 359 (69.6%)               | 340                        | 266 (78.2%)               | 1.44 [1.02, 2.03]             |
| 7. Reference standard and rationale                | 5            | 516                        | 325 (63.0%)               | 340                        | 315 (92.6%)               | 1.72 [0.79, 3.74]             |
| <i>8. Technique of:</i>                            |              |                            |                           |                            |                           |                               |
| 8a. Index test                                     | 5            | 516                        | 355 (68.8%)               | 340                        | 286 (84.1%)               | 1.32 [0.64, 2.72]             |
| 8b. Reference standard                             | 5            | 546                        | 194 (35.5%)               | 340                        | 190 (55.9%)               | 1.28 [0.65, 2.53]             |
| <i>9. Units/cut-offs/categories for:</i>           |              |                            |                           |                            |                           |                               |
| 9a. Index test                                     | 5            | 516                        | 437 (84.7%)               | 340                        | 289 (85.0%)               | 1.37 [0.43, 4.34]             |
| 9b. Reference standard                             | 4            | 428                        | 276 (64.5%)               | 324                        | 218 (67.3%)               | 1.37 [0.99, 1.89]             |
| <i>10. Persons executing:</i>                      |              |                            |                           |                            |                           |                               |
| 10a. Index test                                    | 5            | 516                        | 113 (21.9%)               | 340                        | 120 (35.3%)               | 1.21 [0.86, 1.71]             |
| 10b. Reference standard                            | 5            | 516                        | 57 (11.0%)                | 340                        | 72 (21.2%)                | 1.22 [0.82, 1.83]             |
| <i>11. Blinding of results of:</i>                 |              |                            |                           |                            |                           |                               |
| 11a. Index test                                    | 5            | 516                        | 307 (59.5%)               | 340                        | 171 (50.3%)               | 0.93 [0.58, 1.47]             |
| 11b. Reference test                                | 5            | 516                        | 112 (21.7%)               | 340                        | 110 (32.4%)               | 1.36 [0.87, 2.13]             |
| 12. Methods for statistics used                    | 4            | 396                        | 123 (31.1%)               | 220                        | 58 (26.4%)                | 1.49 [0.54, 4.09]             |
| <i>13. Methods for test reproducibility for:</i>   |              |                            |                           |                            |                           |                               |
| 13a. Index test                                    | 3            | 308                        | 56 (18.2%)                | 203                        | 64 (31.5%)                | 1.01 [0.28, 3.62]             |
| 13b. Reference standard                            | 3            | 308                        | 11 (3.6%)                 | 203                        | 10 (4.9%)                 | 0.55 [0.07, 4.65]             |
| 14. Dates of study                                 | 5            | 516                        | 332 (64.3%)               | 340                        | 241 (70.9%)               | 1.69 [1.23, 2.33]             |
| 15. Characteristics of study population            | 5            | 516                        | 293 (56.8%)               | 340                        | 250 (73.5%)               | 1.85 [1.00, 3.43]             |
| 16. Eligible patients not undergoing either test   | 5            | 516                        | 296 (57.4%)               | 340                        | 198 (58.2%)               | 1.02 [0.76, 1.38]             |
| <i>16a. Flow diagram</i>                           | 4            | 492                        | 15 (3.0%)                 | 313                        | 45 (14.4%)                | 4.79 [1.39, 16.50]            |
| 17. Time interval between tests                    | 4            | 396                        | 127 (32.1%)               | 220                        | 75 (34.1%)                | 1.38 [0.69, 2.76]             |
| 18. Distribution of severity of disease            | 5            | 516                        | 315 (61.0%)               | 340                        | 215 (63.2%)               | 2.18 [0.92, 5.15]             |
| 19. Cross tabulation of results                    | 4            | 396                        | 235 (59.3%)               | 220                        | 159 (72.3%)               | 0.90 [0.53, 1.53]             |
| 20. Adverse events                                 | 3            | 236                        | 35 (14.8%)                | 185                        | 20 (10.8%)                | 0.74 [0.40, 1.37]             |
| 21. Estimates of diagnostic accuracy               | 4            | 396                        | 177 (44.7%)               | 220                        | 96 (43.6%)                | 1.46 [0.67, 3.18]             |
| 22. How uninterpretable results were handled       | 4            | 396                        | 194 (49.0%)               | 220                        | 113 (51.4%)               | 1.10 [0.75, 1.61]             |
| 23. Estimates of variability of accuracy           | 4            | 396                        | 133 (33.6%)               | 220                        | 119 (54.1%)               | 2.62 [1.57, 4.37]             |
| <i>24. Estimates of test reproducibility, for:</i> |              |                            |                           |                            |                           |                               |
| 24a. Index test                                    | 3            | 308                        | 71 (23.1%)                | 203                        | 70 (34.5%)                | 0.84 [0.31, 2.26]             |
| 24b. Reference standard                            | 2            | 148                        | 8 (5.4%)                  | 168                        | 8 (4.8%)                  | 0.87 [0.32, 2.40]             |
| 25. Clinical applicability of findings             | 4            | 396                        | 384 (97.0%)               | 220                        | 215 (97.7%)               | 1.31 [0.16, 10.57]            |
